# Supplementary material
Source: PubMed Central journal article supplement (PMC5978423)
Supplement: NIHMS954540-supplement-Supplemental_Figures.pdf [file NIHMS954540-supplement-Supplemental_Figures.pdf]

# Supplementary Figure 1

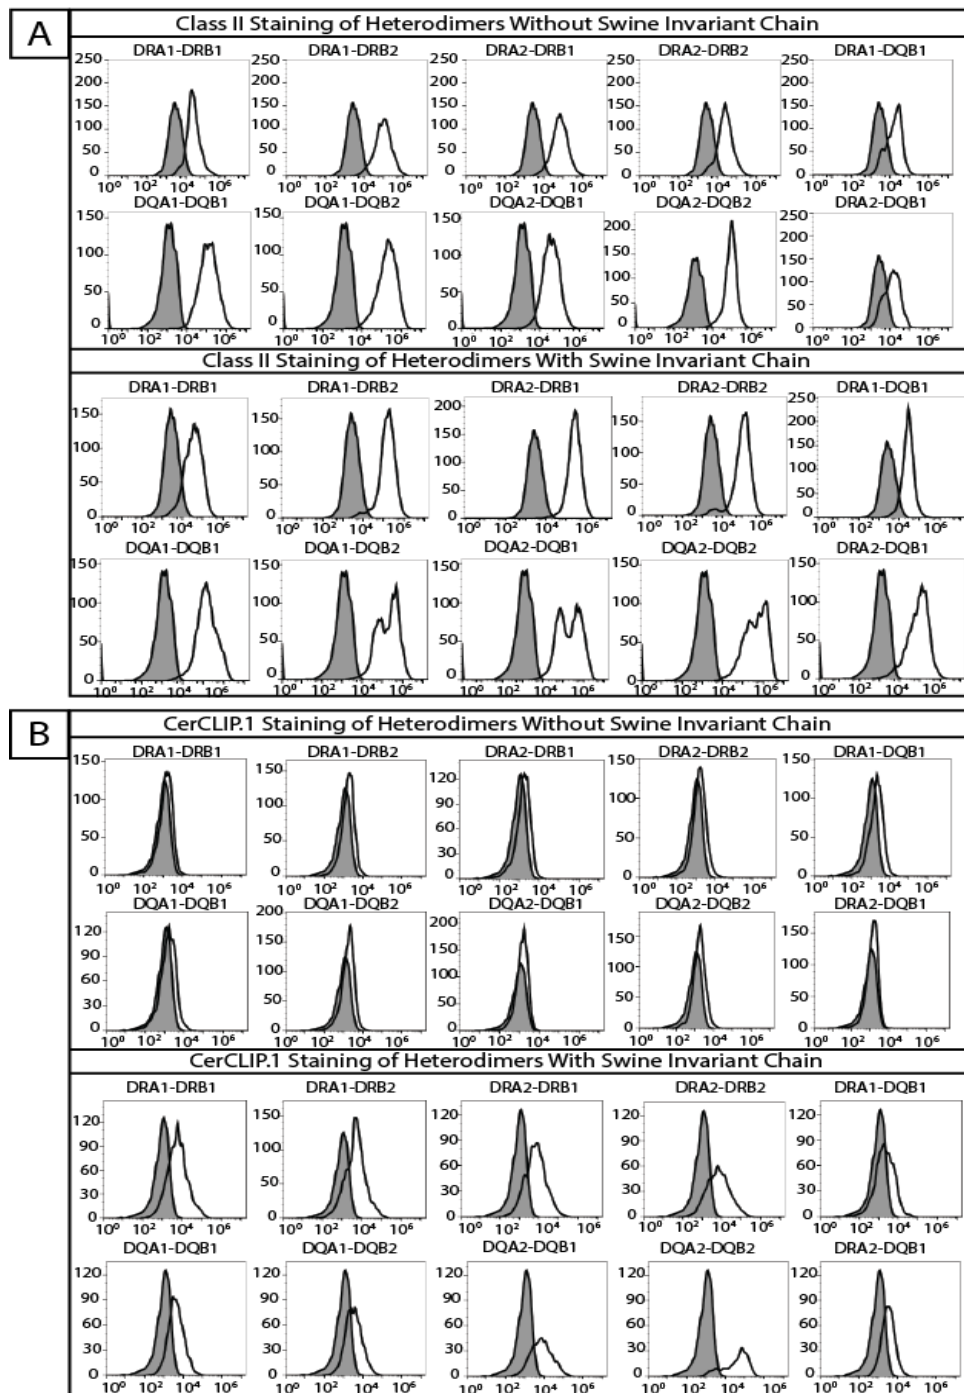

**Supplementary Figure 1:** Post-flow cytometry sorting phenotype of class II SLA single antigen cells. Cells were stained with antibodies specific for **A)** SLA-DR or -DQ or **B)** CerClip.1 to validate cell surface expression of the indicated  $\alpha$ - $\beta$  pairs (white histograms). Grey histograms represent negative control staining of the parent HEK293 cell devoid of  $\beta$ 2-microglobulin and class II SLA.

# Supplementary Figure 2

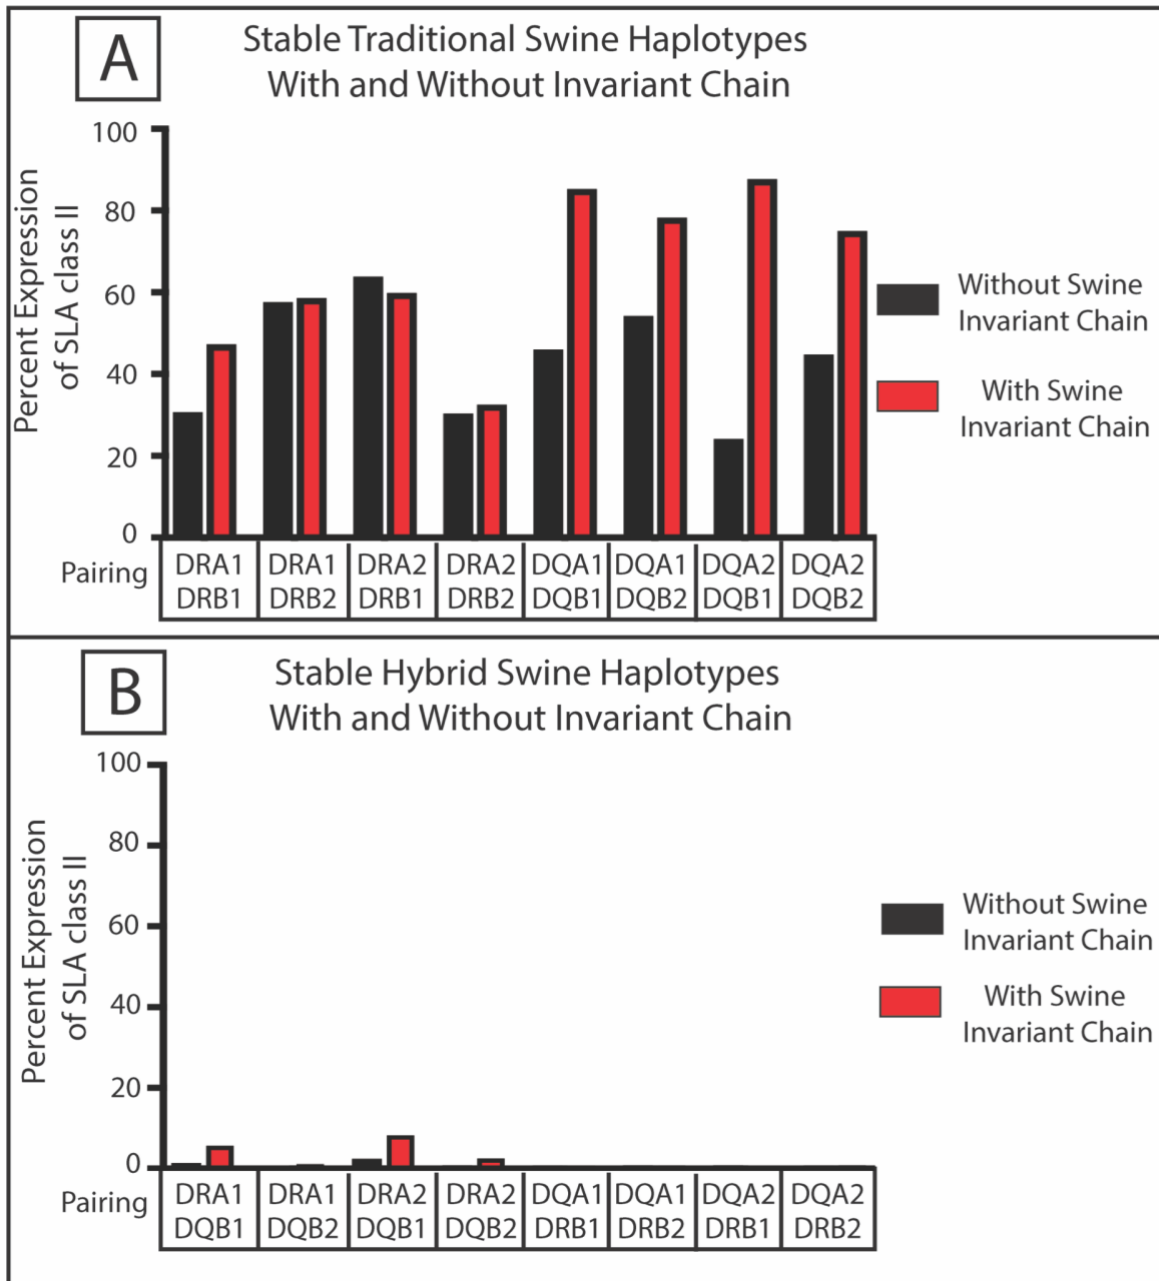

**Supplementary Figure 2:** Antibiotic selection stable expression of SLA class II in HEK 293T cells transfected with sixteen different SLA class II alpha-beta plasmid combinations, with (red) or without (black) dual transfection of the swine invariant chain. The traditional cis- and trans-haplotype pairing are shown in A and the hybrid haplotype pairings are shown in B.
